# Supplementary material for: 3D-branched hierarchical 3C-SiC/ZnO heterostructures for high-performance photodetectors
Source: Royal Society of Chemistry journal article supplement (doi:10.1039/c6nr06236a), 2016-01-01

## Supporting information

# 3D-branched hierarchical 3C-SiC/ZnO heterostructures for high-performance photodetectors

Xinglai Zhang, Baodan Liu,<sup>†,\*</sup> Wenjin Yang,<sup>†</sup> Wenbo Jia,<sup>†</sup> Jing Li,<sup>†</sup> Chunhai Jiang,<sup>§</sup>

Xin Jiang<sup>†,\*</sup>

<sup>†</sup>Shenyang National Laboratory for Materials Science (SYNL), Institute of Metal Research (IMR), Chinese Academy of Sciences (CAS), School of Materials Science and Engineering, University of Science and Technology of China, No. 72 Wenhua Road, Shenyang 110016, Liaoning, China

<sup>§</sup>Institute of Advanced Energy Materials, School of Materials Science and Engineering, Xiamen University of Technology, and Key Laboratory of Functional Materials and Applications of Fujian Province, 600 Ligong Road, Jimei District, Xiamen 361024, Fujian, China

\*To whom correspondence should be addressed: [baodanliu@hotmail.com](mailto:baodanliu@hotmail.com)

## Supporting Information

**Figure S1** Real-color photograph of a 3D-branched 3C-SiC/ZnO heterostructure dispersed on a transparent MgF<sub>2</sub> wafer under 360 nm illumination;

**Figure S2** XRD patterns of primary 3C-SiC NWs and 3D-branched 3C-SiC/ZnO

heterostructures;

**Figure S3** (a) Room temperature PL spectra of the 3C-SiC NWs and 3D-branched 3C-SiC/ZnO heterostructures measured in a spectral range of 330-800 nm.

**Figure S1**

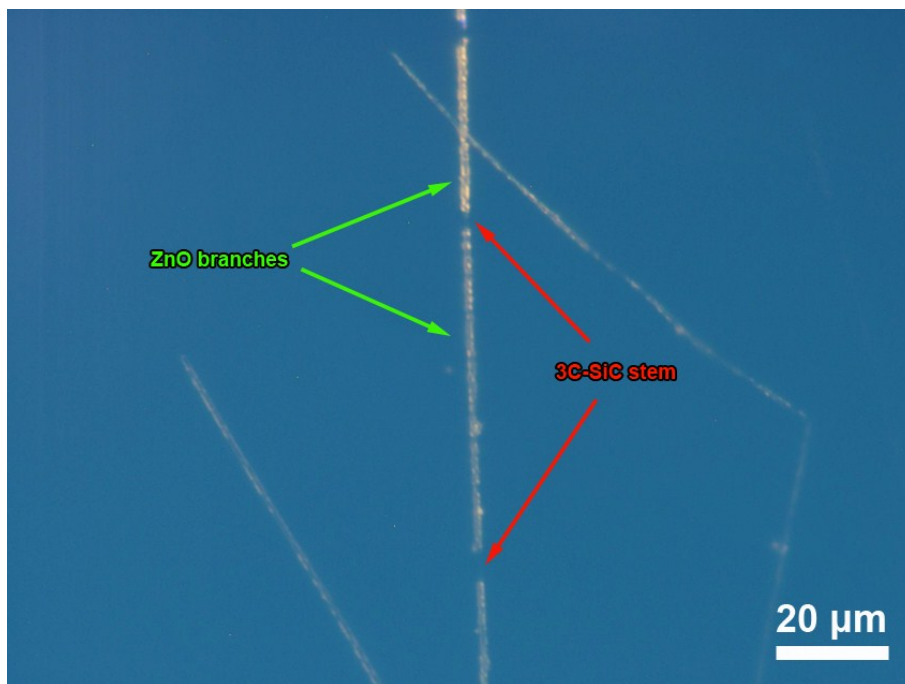

Figure S2

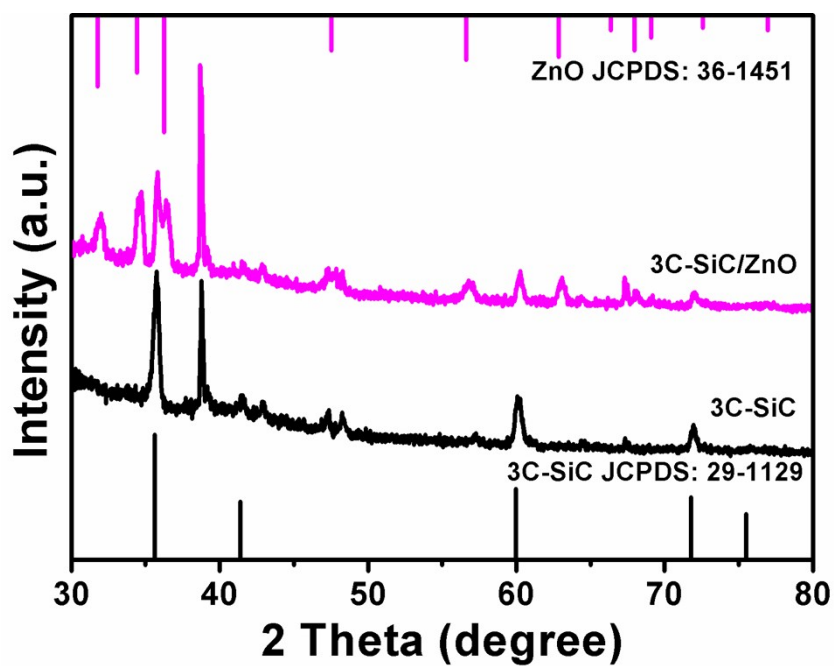

Figure S3

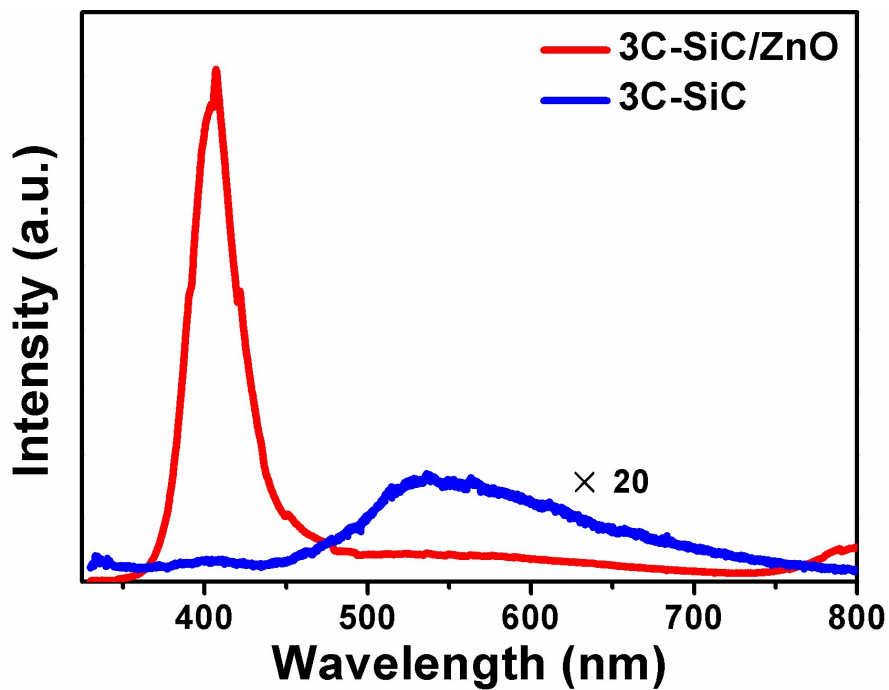

Supplement: c6nr06236a1.pdf [file c6nr06236a1.pdf]
